# Supplementary material for: First Record of Traumatic Myiasis Obtained From Forest Musk Deer (Moschus Berezovskii) Using Dna Barcoding
Source: Research Square preprint supplement (doi:10.21203/rs.3.rs-513730/v1), 2021-05-26
Supplement: Supplementary file 1 [file 8e67d930eb967425b02f018e.xlsx]

## Sheet: MatrixOutput
Table S1 Nucleotide divergence of COI gene fragment (627bp) of 23 Lucilia species and one Calliphora species.
		1	2	3	4	5	6	7	8	9	10	11	12	13	14	15	16	17	18	19	20	21	22	23	24
		Blowflies in this study	L. caesar	L. illustris	L. rica	L. richardsi	L. vulgata	L. coeruleiviridis	L. purpurascens	L. pulverulenta	L. silvarum	L. porphyrina	L. ampullacea	L. bazini	L. retroversa	L. eximia	L. mexicana	L. sericata	L. cuprina	L. hainanensis	L. papuensis	L. fayeae	L. cluvia	L. ochricornis	C. vicina
1	Blowflies in this study		0.00147366	0.00388908	0.0111687	0.0110897	0.0105641	0.0109292	0.0106927	0.0105335	0.00949302	0.00752061	0.00815875	0.00865343	0.0103204	0.00971855	0.0109146	0.0089812	0.00910948	0.00774394	0.00980915	0.00943182	0.0108353	0.0114442	0.0110999
2	L. caesar	0.00540978		0.0037669	0.0110604	0.0112324	0.0105772	0.0110266	0.0106685	0.0106263	0.00965608	0.00728994	0.00773594	0.0085549	0.0101376	0.0098365	0.0110142	0.00887517	0.00892027	0.00768474	0.00956777	0.00945004	0.0108354	0.0113354	0.0112892
3	L. illustris	0.0143272	0.0150425		0.0125891	0.0113582	0.0115214	0.0119665	0.0116352	0.0115795	0.0100382	0.00865878	0.00929454	0.00910598	0.0112339	0.0105893	0.0119168	0.00886427	0.00889569	0.00811881	0.01011	0.0103199	0.0119857	0.0120308	0.011473
4	L. rica	0.0677564	0.0687525	0.0816362		0.0137886	0.0107286	0.0117065	0.00954454	0.0110023	0.0124371	0.0118099	0.0118934	0.0133059	0.0107899	0.00994627	0.0115696	0.0137565	0.0137886	0.0122093	0.0151269	0.00869119	0.0102083	0.0115212	0.0148627
5	L. richardsi	0.0674921	0.0705412	0.0725485	0.0970725		0.0140988	0.0145522	0.0129658	0.0139303	0.00480437	0.0128754	0.0130346	0.0133846	0.0133259	0.0123369	0.0143864	0.00874791	0.00920345	0.0119068	0.0124485	0.0115703	0.0148865	0.0140339	0.0123728
6	L. vulgata	0.0654569	0.0671467	0.074289	0.0665108	0.0950719		0.00335789	0.0071888	0.00378603	0.0138275	0.0114921	0.0119921	0.0126888	0.00719021	0.00558798	0.00336748	0.0126327	0.0127587	0.0122311	0.0134297	0.00712863	0.00794904	0.00876761	0.0143337
7	L. coeruleiviridis	0.0668137	0.0694302	0.0768999	0.0714026	0.0981553	0.011006		0.00811063	0.00207496	0.0141589	0.0122207	0.0128937	0.0131128	0.00769991	0.00562589	0.000831574	0.0134061	0.0135047	0.0126099	0.0139704	0.00765869	0.00826602	0.00992518	0.0148797
8	L. purpurascens	0.0726455	0.074393	0.0812902	0.0660752	0.0953989	0.042071	0.0464707		0.00760573	0.0121352	0.0112268	0.0114003	0.0130494	0.00767263	0.00698171	0.00788276	0.0127472	0.0126975	0.0129265	0.014461	0.00697691	0.00861659	0.00773256	0.0132635
9	L. pulverulenta	0.0670943	0.0695752	0.0774473	0.0693597	0.0967749	0.0168463	0.010455	0.045583		0.0136827	0.0117647	0.0124674	0.0130097	0.00704974	0.00565292	0.00224379	0.012801	0.0129261	0.0122009	0.0135131	0.00712407	0.00792634	0.00897981	0.0143669
10	L. silvarum	0.0564302	0.0591398	0.0654138	0.0875433	0.0203903	0.0941059	0.0965021	0.0902883	0.0956165		0.0108455	0.0109144	0.0116947	0.0128413	0.0119306	0.0140031	0.00767471	0.00800971	0.0104709	0.0114321	0.0113595	0.0137773	0.0132224	0.0112966
11	L. porphyrina	0.0376962	0.0384226	0.0471052	0.0778645	0.0841356	0.0763292	0.0783071	0.0859217	0.0777346	0.0715604		0.00324472	0.0104639	0.0116828	0.0108452	0.0121419	0.0093134	0.00950227	0.00889484	0.0115077	0.0104106	0.0121593	0.0117284	0.0128227
12	L. ampullacea	0.0396232	0.0390006	0.0495676	0.0770456	0.0823595	0.0781677	0.0835087	0.0870505	0.0831922	0.0672637	0.0104889		0.0106663	0.0117221	0.0111945	0.0127909	0.00996274	0.010214	0.00989758	0.0115588	0.0106692	0.012543	0.0119173	0.0129722
13	L. bazini	0.0486634	0.0486979	0.0527347	0.0941085	0.086473	0.0870332	0.0893439	0.0962554	0.0922245	0.0759774	0.0643131	0.0636191		0.0122414	0.0124741	0.0130993	0.0111089	0.0115496	0.00783983	0.0110672	0.0116431	0.0139302	0.0136379	0.0120518
14	L. retroversa	0.0655518	0.0654296	0.0751292	0.0672514	0.0953368	0.0413955	0.0423035	0.0474552	0.0412578	0.0893826	0.0796403	0.0794512	0.0855916		0.00651616	0.0075678	0.0120904	0.0124819	0.0116498	0.0127013	0.00479141	0.00907564	0.00806978	0.0135397
15	L. eximia	0.0701724	0.0726134	0.0779867	0.0715131	0.0923344	0.0374094	0.036778	0.0503012	0.0388641	0.0905841	0.0816283	0.0846236	0.0952513	0.0480108		0.00564352	0.011446	0.0114354	0.0120062	0.0129132	0.00643293	0.00810864	0.00737062	0.0129021
16	L. mexicana	0.0680411	0.0706285	0.0775571	0.0716067	0.0976775	0.0124982	0.00455049	0.0453768	0.0120652	0.096278	0.0789131	0.0840128	0.0902928	0.0426693	0.0365978		0.0133279	0.0133965	0.0126782	0.0140023	0.00757832	0.00817748	0.00961288	0.0147519
17	L. sericata	0.0495405	0.0514079	0.0499863	0.0949886	0.0417689	0.0833448	0.0856714	0.0902033	0.0834241	0.0379814	0.0563972	0.0619057	0.0690207	0.0803978	0.0830342	0.0861208		0.0028477	0.0091142	0.0105503	0.010609	0.0138604	0.0121697	0.012246
18	L. cuprina	0.0520801	0.0531301	0.0512309	0.0968118	0.0459682	0.0839071	0.0864059	0.0899869	0.0844273	0.041437	0.059477	0.0654517	0.0723699	0.084176	0.0829862	0.086571	0.00929226		0.00951267	0.0108254	0.0109245	0.0137559	0.012146	0.0130111
19	L. hainanensis	0.0477882	0.0487883	0.053277	0.0911987	0.082389	0.0938776	0.0947234	0.10339	0.0931156	0.0745145	0.0602333	0.0666394	0.0473276	0.0899503	0.0991947	0.096081	0.0607651	0.0645382		0.0088421	0.0109809	0.0132605	0.0132981	0.0121887
20	L. papuensis	0.062424	0.0618646	0.0658785	0.110486	0.0808138	0.0995058	0.103601	0.112549	0.102048	0.0730868	0.0787713	0.0767008	0.065376	0.0907489	0.103687	0.104575	0.0648657	0.0681446	0.0596855		0.0124584	0.0150198	0.0141998	0.0140343
21	L. fayeae	0.0667659	0.06794	0.0756189	0.0578933	0.0878986	0.0469987	0.0492668	0.0500121	0.0477152	0.0857332	0.0757105	0.0778419	0.0866892	0.0321504	0.0498934	0.0489743	0.0760752	0.0787821	0.0884868	0.0967853		0.0082781	0.0074186	0.0124281
22	L. cluvia	0.0663248	0.0686549	0.0768006	0.0627246	0.098293	0.03841	0.0379068	0.0487618	0.0404124	0.0919165	0.0865822	0.0890589	0.0948666	0.0506147	0.0541427	0.0387802	0.0892341	0.0895859	0.0998423	0.108746	0.0520259		0.0103014	0.0147281
23	L. ochricornis	0.0742169	0.0753241	0.0810958	0.0717997	0.0975697	0.0486562	0.0535572	0.0422565	0.0494993	0.0908653	0.0805019	0.080345	0.0943778	0.044055	0.0506746	0.0523517	0.0793067	0.0806462	0.0989417	0.10459	0.0483905	0.0583457		0.014317
24	C. vicina	0.0687179	0.0718957	0.0738594	0.105337	0.0740642	0.0997797	0.104251	0.0982561	0.102142	0.0692977	0.0816245	0.0834305	0.0757957	0.0996429	0.0983725	0.104102	0.0723625	0.078252	0.0816891	0.091996	0.0928059	0.10407	0.0984099
We used MEGA 7 to compared sequences between groups mean divergence, selected Kimura’s two parameter (K2P) Model (Kimura, 1980) to calculate nucleotide divergence. Standard error estimate(s) are shown above the diagonal and were obtained by a bootstrap procedure (1000 replicates).

## Sheet: Caption
Table. Estimates of Evolutionary Divergence over Sequence Pairs between Groups
The number of base substitutions per site from averaging over all sequence pairs between groups are shown. Standard error estimate(s) are shown above the diagonal. Analyses were conducted using the Kimura 2-parameter model [1]. The rate variation among sites was modeled with a gamma distribution (shape parameter = 1). The analysis involved 1082 nucleotide sequences. Codon positions included were …
1. Kimura M. (1980). A simple method for estimating evolutionary rate of base substitutions through comparative studies of nucleotide sequences. Journal of Molecular Evolution 16:111-120.
2. Kumar S., Stecher G., and Tamura K. (2016). MEGA7: Molecular Evolutionary Genetics Analysis version 7.0 for bigger datasets.Molecular Biology and Evolution 33:1870-1874.
Disclaimer: Although utmost care has been taken to ensure the correctness of the caption, the caption text is provided "as is" without any warranty of any kind. Authors advise the user to carefully check the caption prior to its use for any purpose and report any errors or problems to the authors immediately (www.megasoftware.net). In no event shall the authors and their employers be liable for a…
